# Supplementary material
Source: PubMed Central journal article supplement (PMC2781524)
Supplement: supp_M109.004382_jbc.M109.004382-2.pdf [file supp_M109.004382_jbc.M109.004382-2.pdf]

# Supplementary Figure 2

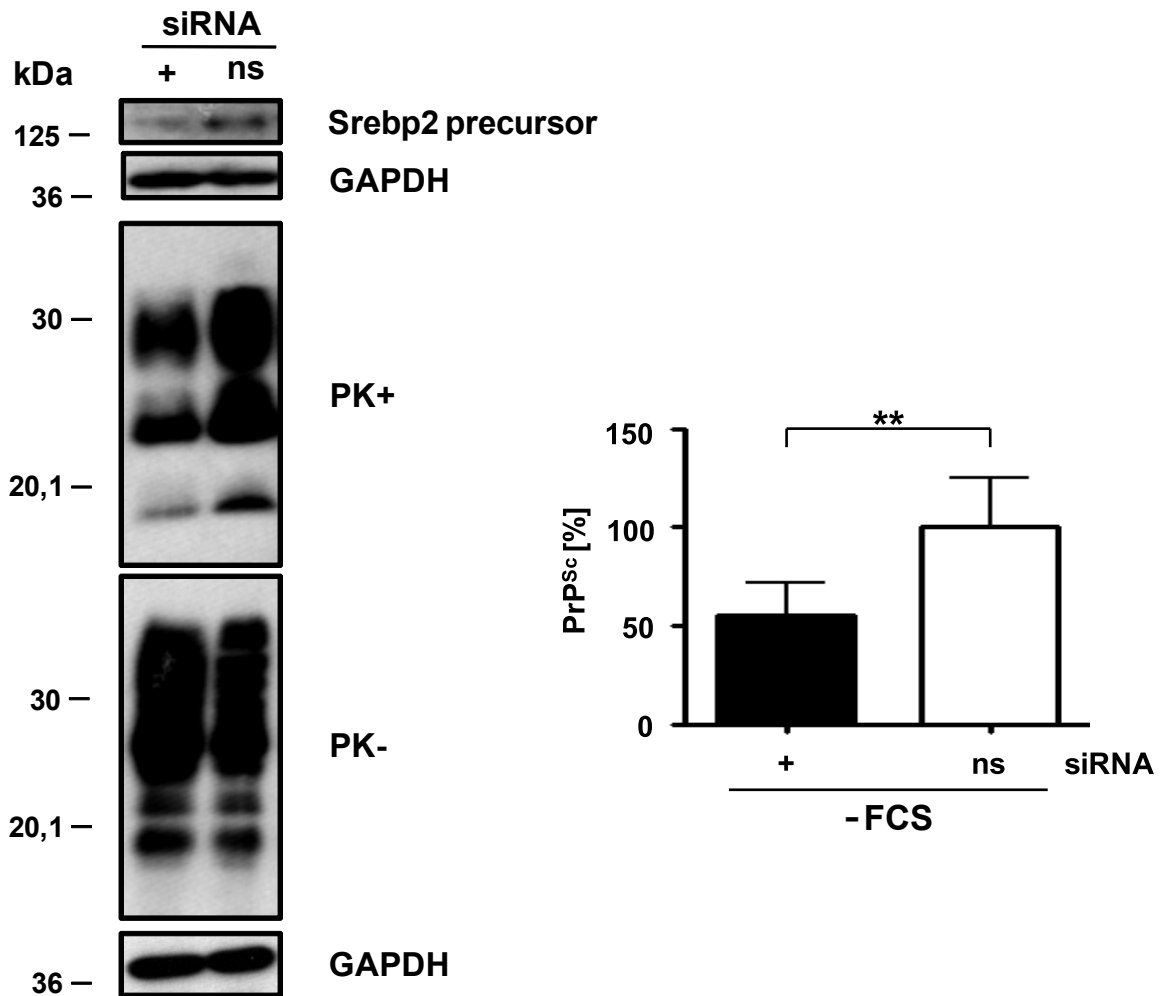

## Suppl. Figure 2

22L infected N2a cells clone 5 were transfected with an alternative siRNA directed against Srebf2 (SI01433138) and passaged in the absence of FCS for 48 h. Cell lysates were checked for PrP<sup>Sc</sup> and total PrP by Western blot using antibody 4H11 (left panel). Srebp2 knock-down was assessed by using antibody ab28482, GAPDH protein levels demonstrate equal sample loading. Densitometric and statistical analysis of five independent transfections revealed a significant reduction of PrP<sup>Sc</sup> in prion infected cells transfected with siRNA against Srebf2 compared to non-silencing siRNA (right panel) ( $p < 0.05$ ). For presentation purposes additional bands were excised.
