# Supplementary material
Source: PubMed Central journal article supplement (PMC2781524)
Supplement: supp_M109.004382_jbc.M109.004382-3.pdf [file supp_M109.004382_jbc.M109.004382-3.pdf]

## Supplementary Figure 3

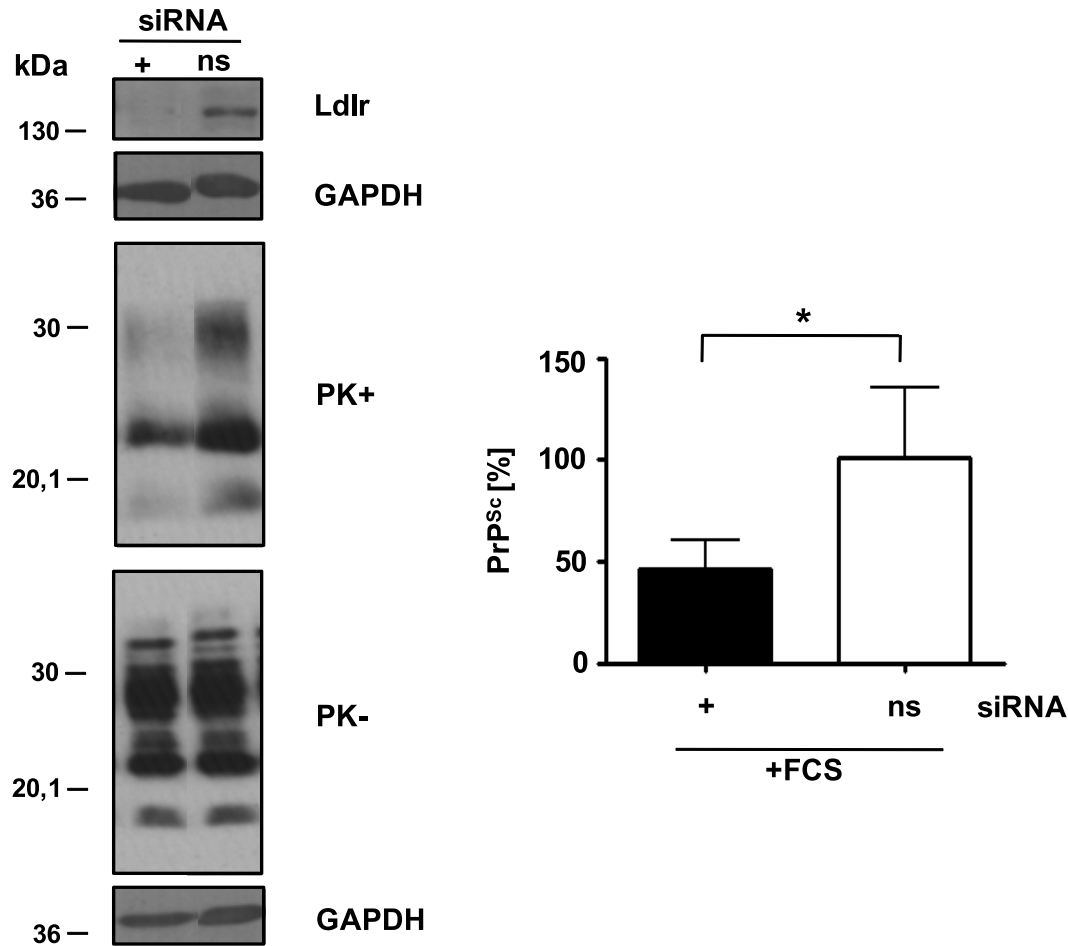

### Suppl. Figure 3

22L infected N2a cells (clone 5) were transfected with siRNA against Ldlr (Sc35803; Santa Cruz Biotechnology) and cultured for 48h in medium supplemented with FCS. Cell lysates were checked for PrP<sup>Sc</sup> and total PrP by Western blot using antibody 4H11 (left panel). Ldlr knock-down was assessed by using antibody ab30532, GAPDH protein levels demonstrate equal sample loading. Densitometric and statistical analysis of five independent transfections revealed a significant reduction of PrP<sup>Sc</sup> in prion infected cells transfected with siRNA against Srebf2 compared to non-silencing siRNA (right panel) (p<0.05). For presentation purposes additional bands were excised.
