# Supplementary material
Source: PubMed Central journal article supplement (PMC2781524)
Supplement: supp_M109.004382_jbc.M109.004382-4.pdf [file supp_M109.004382_jbc.M109.004382-4.pdf]

**Supplementary Table I.** Genes with putative known function differentially expressed in ScN2a vers. mock infected N2a cells

| Putative function <sup>a</sup>  | Clone ID <sup>b</sup> | Gene <sup>c</sup>                                                                                                                                   | Avg fold <sup>d</sup> |
|---------------------------------|-----------------------|-----------------------------------------------------------------------------------------------------------------------------------------------------|-----------------------|
| <b>1) Upregulated</b>           |                       |                                                                                                                                                     |                       |
| Catalytic activity              | MG-15-252a12          | <b>Blvrb</b> : Biliverdin reductase B                                                                                                               | 4.62                  |
| Cell cycle                      | MG-3-76n3             | <b>Ddit3</b> : DNA-damage inducible transcript 3<br>( <b>Synonyms</b> : C/EBP homologous protein 10, chop, CHOP-10, CHOP10, Gadd153)                | 4.53                  |
| Cholesterol metabolism          | MG-3-37f4             | <b>Idi1</b> : Isopentenyl-diphosphate delta-isomerase 1<br>( <b>Synonym</b> : Ipp)                                                                  | 3.22                  |
|                                 | MG-6-57e23            | <b>Hmgcs1</b> : 3-hydroxy-3-methylglutaryl-Coenzyme A synthase 1                                                                                    | 7.46                  |
|                                 | MG-8-94d7             | <b>Hmgcr</b> : 3-hydroxy-3-methylglutaryl-Coenzyme A reductase ( <b>Synonyms</b> : HMG-CoAR, Red)                                                   | 3.32                  |
|                                 | MG-8-50j2             | <b>Dhcr7</b> : 7-dehydrocholesterol reductase                                                                                                       | 3.53                  |
|                                 | MG-8-117d11           | <b>Glul</b> : Glutamine synthetase ( <b>Synonyms</b> : Glns, GS)                                                                                    | 6.17                  |
|                                 | MG-14-10615           | <b>Sc4mol</b> : C-4 methyl sterol oxidase                                                                                                           | 10.91                 |
|                                 | MG-3-12a15            | <b>Fdft1</b> : farnesyl diphosphate farnesyl transferase 1<br>( <b>Synonyms</b> : SQS, squalene synthase)                                           | 5.58                  |
|                                 | MG-6-12i22            | <b>Srebf2</b> : sterol regulatory element binding factor 2<br>( <b>Synonym</b> : SREBP-2)                                                           | 3.25                  |
| Cholesterol/Lipid metabolism    | MG-15-189g14          | <b>Scd2</b> : stearyl-Coenzyme A desaturase 2<br>( <b>Synonym</b> : Scd-2)                                                                          | 4.31                  |
|                                 | MG-15-90m19           | <b>Ldlr</b> : Low-density lipoprotein receptor precursor                                                                                            | 3.82                  |
| DNA binding; DNA integration    | MG-3-49p12            | <b>Ppfibp2</b> : protein tyrosine phosphatase, receptor-type, F interacting protein, binding protein 2<br>( <b>Synonyms</b> : Ccpl1, liprin beta 2) | 3.56                  |
| Energy metabolism               | MG-13-1a23            | <b>Eno2</b> : enolase 2, gamma neuronal ( <b>Synonyms</b> : Eno-2, NSE)                                                                             | 3.16                  |
| GTPase Regulator                | MG-6-1317             | <b>Gdi1</b> : guanosine diphosphate (GDP) dissociation inhibitor 1 ( <b>Synonyms</b> : GDIA, GDIalpha, MGC:21593, Rab GDIalpha)                     | 3.32                  |
| Intracellular signaling cascade | MG-13-117j9           | <b>Ahnak</b> : AHNAK nucleoprotein (desmoyokin)<br>( <b>Synonym</b> : DY6)                                                                          | 8.17                  |
| Iron ion binding                | MG-14-106n17          | <b>Trf</b> : Transferrin ( <b>Synonyms</b> : Cd176, HP, Tfn)                                                                                        | 5.16                  |
| MAP kinase; Hydrolase activity  | MG-3-150c14           | <b>Dusp4</b> : Dual specificity phosphatase 4                                                                                                       | 3.46                  |
| Proteolysis; metal ion binding  | MG-3-5f9              | <b>X83328</b> : EST X83328 ( <b>Synonym</b> : ESTM12)                                                                                               | 3.19                  |
| Transcription elongation factor | MG-16-5b5             | <b>Supt6h</b> : suppressor of Ty 6 homolog ( <i>S. cerevisiae</i> )<br>( <b>Synonym</b> : SPT6)                                                     | 3.49                  |
| Transferase activity            | MG-3-81d5             | <b>Gstm1</b> : glutathione S-transferase, mu 1<br>( <b>Synonyms</b> : Gstb-1, Gstb1)                                                                | 3.60                  |
| Translation                     | MG-8-22p22            | <b>Rps10</b> : ribosomal protein S10                                                                                                                | 3.22                  |

**Supplementary Table I (continued)**

| <b>Putative function<sup>a</sup></b> | <b>Clone ID<sup>b</sup></b> | <b>Gene<sup>c</sup></b>                                                                                                       | <b>Avg fold<sup>d</sup></b> |
|--------------------------------------|-----------------------------|-------------------------------------------------------------------------------------------------------------------------------|-----------------------------|
| Translocation elongation factor      | MG-12-267k10                | <b>Gtpbp2</b> : GTP binding protein 2                                                                                         | 3.53                        |
| Transport and binding protein        | MG-3-68i14                  | <b>Ucp2</b> : uncoupling protein 2 (mitochondrial, proton carrier) ( <b>Synonyms</b> : Slc25a8)                               | 3.29                        |
|                                      | MG-6-74c18                  | <b>IER3</b> : immediate early response 3 ( <b>Synonyms</b> : cAMP inducible gene 3, cI-3, gly96, IEX-1)                       | 4.90                        |
|                                      | MG-8-79a16                  | <b>Snag1</b> : Sorting nexin associated golgi protein 1                                                                       | 3.06                        |
| Unknown function                     | MG-3-28i9                   | PREDICTED: similar to putative retrovirus-related gag protein                                                                 | 11.47                       |
| <b>2) Downregulated</b>              |                             |                                                                                                                               |                             |
| Aminoacyl-tRNA ligase                | MG-6-1c9                    | <b>Nars</b> : asparaginyl-tRNA synthetase ( <b>Synonym</b> : ASNRS)                                                           | -2.83                       |
| Apoptosis                            | MG-6-19l12                  | <b>Eif5a</b> : eukaryotic translation initiation factor 5A ( <b>Synonym</b> : D19Wsu54e)                                      | -3.16                       |
| ATP binding                          | MG-14-80g20                 | <b>Ddx3x</b> : DEAD/H (Asp-Glu-Ala-Asp/His) box polypeptide 3, X-linked ( <b>Synonyms</b> : embryonic RNA helicase, Fin14)    | -4.22                       |
|                                      | MG-6-43d8                   | <b>Ak2</b> : Adenylate kinase 2 (mitochondrial)                                                                               | -3.10                       |
|                                      | MG-15-86p19                 | <b>Rrm1</b> : ribonucleotide reductase M1 ( <b>Synonym</b> : RnrM1)                                                           | -4.66                       |
| ATP binding, DNA-binding             | MG-15-98p23                 | <b>Top2a</b> : topoisomerase (DNA) II alpha ( <b>Synonyms</b> : DNA Topoisomerase II alpha, Top-2)                            | -5.31                       |
| ATP binding, kinase activity         | MG-6-1a13                   | <b>Nme1</b> : Nucleoside diphosphate kinase A                                                                                 | -3.86                       |
| ATP binding, nucleotide binding      | MG-3-141m24                 | <b>Cct3</b> : chaperonin subunit 3 (gamma) ( <b>Synonyms</b> : Cctg, Tcp1-rs3, TriC-P5 )                                      | -3.78                       |
| ATP metabolism                       | MG-6-11e3                   | <b>Ak1</b> : adenylate kinase 1                                                                                               | -2.77                       |
| Cell cycle                           | MG-16-9b23                  | <b>Cdc2a</b> : cell division cycle 2 homolog A ( <b>Synonyms</b> : Cdc2, CDK1, p34)                                           | -4.57                       |
|                                      | MG-13-57h1                  | <b>Cks1b</b> : CDC28 protein kinase 1b ( <b>Synonym</b> : Cks1)                                                               | -7.39                       |
|                                      | MG-8-12n3                   | <b>Mcm2</b> : minichromosome maintenance deficient 5; DNA replication licensing factor Mcm2 ( <b>Synonyms</b> : Cdc11, Mcmd2) | -4.11                       |
|                                      | MG-15-222i11                | <b>Mcm4</b> : minichromosome maintenance deficient 4 homolog (S. cerevisiae) ( <b>Synonyms</b> : 19G, Cdc21, mcde21, Mcmd4)   | -3.03                       |
| Cell proliferation                   | MG-15-195c13                | <b>Mki67</b> : antigen identified by monoclonal antibody Ki 67 ( <b>Synonym</b> : Ki-67)                                      | -3.90                       |
|                                      | MG-15-206n21                | <b>Cse1l</b> : chromosome segregation 1-like ( <b>Synonyms</b> : Cpts, Cas, Xpo2)                                             | -3.49                       |

**Supplementary Table I (continued)**

| <b>Putative function<sup>a</sup></b>   | <b>Clone ID<sup>b</sup></b> | <b>Gene<sup>c</sup></b>                                                                                         | <b>Avg fold<sup>d</sup></b> |
|----------------------------------------|-----------------------------|-----------------------------------------------------------------------------------------------------------------|-----------------------------|
| Chromatin binding, histone methylation | MG-8-46e20                  | <b>Enx-1</b> : Enhancer of zeste homolog 2 ( <b>Synonyms</b> : Enx1h, Ezh2)                                     | -3.35                       |
| Cytoskeleton                           | MG-14-72k10                 | <b>Pfn1</b> : profilin 1 ( <b>Synonyms</b> : actin binding protein, Pfn)                                        | -5.42                       |
|                                        | MG-6-1511                   | <b>Mylc2b</b> : myosin light chain, regulatory B ( <b>Synonym</b> : RLC-B)                                      | -2.56                       |
|                                        | MG-3-137j23                 | <b>Tuba2</b> : Tubulin alpha 2                                                                                  | -2.69                       |
|                                        | MG-3-18m8                   | <b>Tubb2c</b> : tubulin, beta 2c                                                                                | -3.56                       |
|                                        | MG-8-15n24                  | <b>Tubb6</b> : tubulin, beta 6                                                                                  | -3.86                       |
|                                        | MG-8-100j17                 | <b>Flna</b> : filamin, alpha                                                                                    | -2.61                       |
|                                        | MG-6-3c22                   | <b>Tmsb4x</b> : thymosin, beta 4, X chromosome ( <b>Synonym</b> : Ptmb4)                                        | -4.26                       |
| DNA binding                            | MG-13-1g21                  | <b>Ncl</b> : nucleolin ( <b>Synonym</b> : Nucl)                                                                 | -2.53                       |
|                                        | MG-13-54a15                 | <b>Pole4</b> : polymerase (DNA-directed), epsilon 4 (p12 subunit)                                               | -3.13                       |
|                                        | MG-3-91d6                   | <b>Dek</b> : DEK oncogene                                                                                       | -4.57                       |
|                                        | MG-14-2519                  | <b>Hmgn2</b> : high mobility group nucleosomal binding domain 2 ( <b>Synonyms</b> : HMG-17, Hmg17)              | -12.55                      |
| DNA binding, DNA packaging             | MG-10-1m3                   | <b>Ard1</b> : N-acetyltransferase Ard1 homolog ( <b>Synonym</b> : Te2)                                          | -3.39                       |
| DNA binding, DNA replication           | MG-16-611                   | <b>Ris2</b> : retroviral integration site 2 ( <b>Synonym</b> : Cdt1)                                            | -3.22                       |
| DNA binding; nucleosome assembly       | MG-3-24h23                  | <b>H3f3b</b> : H3 histone, family 3B ( <b>Synonym</b> : H3.3B)                                                  | -2.59                       |
| DNA binding; protein binding           | MG-3-33o2                   | <b>Bclaf1</b> : BCL2-associated transcription factor 1                                                          | -2.64                       |
| DNA repair; mRNA processing            | MG-8-93b10                  | <b>Sfpq</b> : splicing factor proline/glutamine rich (polypyrimidine tract binding protein associated)          | -3.13                       |
| Electron transport                     | MG-6-1a15                   | <b>Txn1</b> : Thioredoxin 1                                                                                     | -3.03                       |
|                                        | MG-6-1a17                   | <b>Cycc</b> : Cytochrome c, somatic                                                                             | -4.76                       |
| Energy metabolism                      | MG-6-1k17                   | <b>Ctbp1</b> : C-terminal binding protein 1 ( <b>Synonym</b> : BARS)                                            | -2.66                       |
| GTP binding                            | MG-3-8a7                    | <b>Ran</b> : RAN, member RAS oncogene family                                                                    | -3.71                       |
| GTPase activation                      | MG-3-76d11                  | <b>Rangap1</b> : RAN GTPase activating protein 1 ( <b>Synonym</b> : Fug1)                                       | -2.64                       |
| Heparin binding                        | MG-4-86a20                  | <b>Hdgf</b> : hepatoma-derived growth factor                                                                    | -2.64                       |
| Iron ion binding                       | MG-14-36k20                 | <b>Plod3</b> : procollagen-lysine, 2-oxoglutarate 5-dioxygenase 3 ( <b>Synonyms</b> : LH3, lysyl hydroxylase 3) | -2.59                       |
| Lipid metabolism                       | MG-3-58f20                  | <b>Prdx6</b> : peroxiredoxin 6 ( <b>Synonyms</b> : 1-Cys Prx, Brp-12, CP-3, GPx, Ltw-4)                         | -2.64                       |

**Supplementary Table I (continued)**

| <b>Putative function<sup>a</sup></b>         | <b>Clone ID<sup>b</sup></b> | <b>Gene<sup>c</sup></b>                                                                                                                                                                 | <b>Avg fold<sup>d</sup></b> |
|----------------------------------------------|-----------------------------|-----------------------------------------------------------------------------------------------------------------------------------------------------------------------------------------|-----------------------------|
| Malate metabolism; electron carrier          | MG-8-77i22                  | <b>Me2</b> : malic enzyme 2, NAD(+)-dependent, mitochondrial                                                                                                                            | -2.51                       |
| Metal ion binding                            | MG-15-203112                | <b>Lyar</b> : Ly1 antibody reactive clone                                                                                                                                               | -3.10                       |
| Metal ion binding, zinc ion binding          | MG-3-17g16                  | <b>Crip2</b> : cysteine rich protein 2 ( <b>Synonyms</b> : Crp, ESP1, Hlp)                                                                                                              | -2.86                       |
| Methyltransferase activity                   | MG-4-145m17                 | <b>Srm</b> : Spermidine synthase                                                                                                                                                        | -3.82                       |
| mRNA processing                              | MG-12-188i10                | <b>Pm14</b> : Pre-mRNA branch site protein p14                                                                                                                                          | -2.89                       |
|                                              | MG-16-170m19                | <b>Sfrs3</b> : splicing factor, arginine/serine-rich 3 (SRp20) ( <b>Synonym</b> : X16)                                                                                                  | -6.30                       |
|                                              | MG-3-43d7                   | <b>Snrpg</b> : small nuclear ribonucleoprotein polypeptide G ( <b>Synonym</b> : SMG)                                                                                                    | -2.97                       |
|                                              | MG-6-1a19                   | <b>Ptbp1</b> : polypyrimidine tract binding protein 1 ( <b>Synonyms</b> : hnRNP I, pPTB, Ptb, PTB-1, PTB2, PTB3, PTB4)                                                                  | -3.90                       |
|                                              | MG-6-41o6                   | <b>Pabpn1</b> : poly(A) binding protein, nuclear 1 ( <b>Synonyms</b> : PAB2, Pabp3, poly(A) binding protein II)                                                                         | -2.75                       |
| Protein binding                              | MG-12-233n24                | <b>Sla2</b> : Src-like-adaptor 2 ( <b>Synonyms</b> : SLAP-2, SLAP2)                                                                                                                     | -3.10                       |
|                                              | MG-3-5g6                    | <b>Rasa1</b> : RAS p21 protein activator 1 ( <b>Synonym</b> : Gap)                                                                                                                      | -3.53                       |
|                                              | MG-3-70b18                  | <b>Maged1</b> : melanoma antigen, family D, 1 ( <b>Synonyms</b> : Dlxin-1, DXBwg1492e)                                                                                                  | -3.35                       |
|                                              | MG-3-3k20                   | <b>Stmn1</b> : Stathmin ( <b>Synonyms</b> : 19K, Lag, Lap18, leukemia associated phosphoprotein p18, metablastin, oncoprotein18, op18, p18, p19, pig, PP17, PP18, PR22, prosolin, SMN ) | -4.85                       |
|                                              | MG-3-4i4                    | <b>Tipin</b> (Interim): timeless interacting protein                                                                                                                                    | -2.53                       |
| Protein binding, histone binding             | MG-3-31o18                  | <b>Nasp</b> : Nuclear autoantigenic sperm protein ( <b>Synonym</b> : Epcs32)                                                                                                            | -6.11                       |
| Protein binding; metal ion binding           | MG-3-10a14                  | <b>Trim28</b> : tripartite motif protein 28 ( <b>Synonyms</b> : KAP-1, KRIP-1, Tif1b)                                                                                                   | -3.03                       |
| Protein binding; protein folding             | MG-6-22p24                  | <b>Ppia</b> : peptidylprolyl isomerase A ( <b>Synonyms</b> : Cphn, cyclophilin A, CyP-18, CypA)                                                                                         | -3.39                       |
| Protein binding; protein inport into nucleus | MG-13-144a3                 | <b>Kpnb1</b> : karyopherin (importin) beta 1 ( <b>Synonym</b> : Impnb)                                                                                                                  | -3.06                       |
| Protein biosynthesis                         | MG-14-83c21                 | <b>Cars</b> : cysteinyl-tRNA synthetase ( <b>Synonym</b> : CA3)                                                                                                                         | -2.75                       |
|                                              | MG-14-68e19                 | <b>Gfm1</b> : G elongation factor, mitochondrial 1                                                                                                                                      | -2.75                       |
|                                              | MG-3-37k5                   | <b>Mrpl12</b> : mitochondrial ribosomal protein L12 ( <b>Synonyms</b> : MRP-L12, Rpml12)                                                                                                | -6.11                       |
|                                              | MG-8-89h3                   | <b>Gspt1</b> : G1 to S phase transition 1 ( <b>Synonyms</b> : G1st, Gst-1)                                                                                                              | -2.72                       |

**Supplementary Table I (continued)**

| Putative function <sup>a</sup> | Clone ID <sup>b</sup> | Gene <sup>c</sup>                                                                                                                                          | Avg fold <sup>d</sup> |
|--------------------------------|-----------------------|------------------------------------------------------------------------------------------------------------------------------------------------------------|-----------------------|
| Protein folding                | MG-8-1e3              | <b>Fkbp4</b> : FK506 binding protein 4 ( <b>Synonyms</b> : FKBP-52, FKPB52, p59)                                                                           | -3.03                 |
|                                | MG-3-71m8             | <b>Dnajb4</b> : DnaJ (Hsp40) homolog, subfamily B, member 4                                                                                                | -2.59                 |
|                                | MG-4-2h1              | <b>Hsp110</b> : heat shock protein 110 ( <b>Synonyms</b> : 105kDa, hsp-E7I, Hsp105, HSP105 42 C-HSP, HSP1)                                                 | -4.85                 |
| Protein transporter            | MG-14-110m7           | <b>Xpo5</b> : exprotin 5 ( <b>Synonym</b> : Exp5)                                                                                                          | -4.53                 |
| Ribosome biogenesis            | MG-15-188a15          | <b>Nol5a</b> : Nucleolar protein 5a ( <b>Synonym</b> : Nop56)                                                                                              | -4.85                 |
| RNA binding; RNA processing    | MG-3-10k3             | <b>Hnrpc</b> : heterogeneous nuclear ribonucleoprotein C ( <b>Synonyms</b> : hnRNP C1, hnRNP C2, hnRNPC1, hnRNPC2, snoRNA MBI-122)                         | -2.56                 |
| RNA binding; RNA processing    | MG-12-22817           | <b>Hnrpa2b1</b> : Heterogeneous nuclear ribonucleoproteins A2/B1 ( <b>Synonyms</b> : hnrmp-A, Hnrpa2)                                                      | -4.22                 |
|                                | MG-15-95e6            | <b>Hnrpab</b> : Heterogeneous nuclear ribonucleoprotein A/B ( <b>Synonyms</b> : CBF-A, Cgbfa)                                                              | -3.53                 |
|                                | MG-8-31a6             | <b>Hnrpu</b> : Heterogenous nuclear ribonucleoprotein U ( <b>Synonym</b> : Sp120)                                                                          | -4.53                 |
| RNA processing; DNA binding    | MG-6-19g10            | <b>Pcbp2</b> : poly(rC) binding protein 2 ( <b>Synonyms</b> : alphaCP-2, Hnrpx)                                                                            | -2.97                 |
| RNA binding                    | MG-3-76o9             | <b>Nhp211</b> : NHP2-like protein 1 (High mobility group-like nuclear protein 2 homolog 1) ( <b>Synonyms</b> : FA-1, Fertilization antigen-1, Fta1, Ssfal) | -2.83                 |
|                                | MG-6-42b15            | Splicing factor U2AF 65 kDa subunit                                                                                                                        | -3.03                 |
|                                | MG-6-65c15            | <b>Oxct1</b> : 3-oxoacid CoA transferase 1 ( <b>Synonym</b> : Scot-s)                                                                                      | -2.61                 |
| Succinyl-CoA metabolism        | MG-6-65c15            |                                                                                                                                                            |                       |
| Transcription regulation       | MG-14-81j6            | <b>Id1</b> : inhibitor of DNA binding 1 ( <b>Synonym</b> : Idb1)                                                                                           | -3.03                 |
| Translation                    | MG-8-32a23            | <b>Eif1</b> : eukaryotic translation initiation factor 1 ( <b>Synonym</b> : Sui1-rs1)                                                                      | -3.03                 |
|                                | MG-16-5j12            | <b>Itgb4bp</b> : integrin beta 4 binding protein ( <b>Synonym</b> : Eif6)                                                                                  | -2.53                 |
|                                | MG-15-66g15           | <b>Ranbp1</b> : Ran binding protein 1 ( <b>Synonym</b> : Htf9a)                                                                                            | -4.90                 |
| Transport and binding protein  | MG-6-3h11             | <b>Cplx1</b> : complexin 1                                                                                                                                 | -3.00                 |
|                                | MG-8-42j10            | <b>Cd24</b> : Signal transducer CD24 precursor                                                                                                             | -2.80                 |
|                                | MG-3-49o10            | <b>Rpp21</b> : ribonuclease P 21 subunit (human)                                                                                                           | -3.39                 |
| tRNA processing                | MG-3-49o10            |                                                                                                                                                            |                       |
| Unknown function               | MG-14-56o5            | <b>Slc38a2</b> : solute carrier family 38, member 2                                                                                                        | -2.83                 |
|                                | MG-14-91g24           | <b>Rbm13</b> : RNA binding motif protein 13                                                                                                                | -3.74                 |
|                                | MG-16-179o20          | <b>Lsm2</b> : U6 snRNA-associated Sm-like protein Lsm2                                                                                                     | -3.71                 |
|                                | MG-16-3e3             | <b>NM_024096</b> : XTP3-transactivated protein A                                                                                                           | -5.37                 |

**Supplementary Table I (continued)**

| <b>Putative function<sup>a</sup></b> | <b>Clone ID<sup>b</sup></b> | <b>Gene<sup>c</sup></b>                                                                               | <b>Avg fold<sup>d</sup></b> |
|--------------------------------------|-----------------------------|-------------------------------------------------------------------------------------------------------|-----------------------------|
|                                      | MG-3-103a23                 | <b>NP_109610</b> : stress-associated endoplasmic reticulum protein 1                                  | -2.77                       |
|                                      | MG-3-106g16                 | <b>Erh</b> : Enhancer of rudimentary homolog<br>( <b>Synonyms</b> : Mer, Prei1)                       | -4.66                       |
|                                      | MG-3-22j13                  | <b>Gpiap1</b> : GPI-anchored membrane protein 1                                                       | -2.72                       |
|                                      | MG-6-10a10                  | <b>Cdk2ap1</b> : Cyclin-dependent kinase 2-associated protein 1                                       | -2.92                       |
|                                      | MG-6-41h1                   | <b>SET</b> : SET protein                                                                              | -7.46                       |
|                                      | MG-8-40d18                  | <b>Anp32b</b> : acidic nuclear phosphoprotein 32 family, member B ( <b>Synonyms</b> : PAL31, PHAPI2a) | -5.00                       |

<sup>a</sup> The putative gene function

<sup>b</sup> The microarray clone ID

<sup>c</sup> Gene name

<sup>d</sup> In the microarray experiment determined average fold gene expression
