# Supplementary material
Source: PubMed Central journal article supplement (PMC2781524)
Supplement: supp_M109.004382_jbc.M109.004382-5.pdf [file supp_M109.004382_jbc.M109.004382-5.pdf]

## Supplemental Table II

### Classification by molecular functions and biological processes

For further analysis of the significant differentially regulated genes in the 22L infected N2a cells we used the Gene Ontology(GO)Filter Structure of the BibliospherePathway Edition to filter for Biological processes. These GOFilters consist of a hierarchy of terms and the corresponding annotations for the BiblioSphere analysis. Based on the number of observed and expected annotations for each term a statistical analysis is also performed. Whether a certain annotation or group of annotations is over- or underrepresented within the dataset of genes is indicated by the Z-Score of this item

| <b>Gene Ontology terms</b>                                                                                   |                |                                                                                                                                                                                                                                             |
|--------------------------------------------------------------------------------------------------------------|----------------|---------------------------------------------------------------------------------------------------------------------------------------------------------------------------------------------------------------------------------------------|
| <b>Biological processes</b> overrepresented within the group of differentially <b>down-regulated genes</b> . |                |                                                                                                                                                                                                                                             |
| <b>Term</b>                                                                                                  | <b>Z-Score</b> | <b>Genes</b>                                                                                                                                                                                                                                |
| Biopolymer metabolic process                                                                                 | 4,41           | <i>Ard1, Bclaf1, Cars, Ccnb1, Cdc2a, Cdt1, Ezh2, Gspt1, H3f3b, Hmgn2, Hnrpa2b1, Hnrpab, Hnrpc, Id1, Lsm2, Maged1, Mcm2, Mcm4, Nars, Nasp, Nhp211, Pabpn1, Pcbp2, Pfn1, Plod3, Ptbp1, Rasa1, Rrm1, Set, Sfpq, Sfrs3, Sla2, Top2a, Trim28</i> |
| ↳ DNA metabolic process                                                                                      | 5,72           |                                                                                                                                                                                                                                             |
| ↳ DNA replication                                                                                            | 5,29           |                                                                                                                                                                                                                                             |
| ↳ DNA replication initiation                                                                                 | 9,89           |                                                                                                                                                                                                                                             |
| ↳ DNA packaging                                                                                              | 5,48           |                                                                                                                                                                                                                                             |
| ↳ DNA genomic change                                                                                         | 7,83           |                                                                                                                                                                                                                                             |
| ↳ RNA metabolic process                                                                                      | 4,89           |                                                                                                                                                                                                                                             |
| ↳ RNA processing                                                                                             | 7,46           |                                                                                                                                                                                                                                             |
| ↳ mRNA metabolic process                                                                                     | 7,77           |                                                                                                                                                                                                                                             |
| Macromolecule complex assembly                                                                               | 8,02           | <i>Csell, Eif1, Eif5a, Fkbp4, H3f3b, Itgb4bp, Kpnb1, Lsm2, Mcm2, Set, Sfrs3</i>                                                                                                                                                             |
| ↳ Protein-RNA complex assembly                                                                               | 7,59           |                                                                                                                                                                                                                                             |
| ↳ assembly of spliceosomal tri-snRNP                                                                         | 7,96           |                                                                                                                                                                                                                                             |
| ↳ Ribosome assembly                                                                                          | 6,1            |                                                                                                                                                                                                                                             |
| nucleobase, nucleoside, nucleotide and nucleic acid metabolic process                                        | 6,38           | <i>Ak2, Ard1, Bclaf1, Cars, Cdt1, Erh, Ezh2, Gspt1, H3f3b, Hmgn2, Hnrpa2b1, Hnrpab, Hnrpc, Id1, Lsm2, Maged1, Mcm2, Mcm4, Nars, Nasp, Nhp211, Nme1, Pabpn1, Pcbp2, Pfn1, Ptbp1, Rasa1, Rrm1, Set, Sfrs3, Sla2, Top2a, Trim28</i>            |
| Mitotic cell cycle                                                                                           | 5,85           | <i>Anp32b, Ccnb1, Cdc2a, Cdt1, Gspt1, Incenp, Stmn1</i>                                                                                                                                                                                     |
| Cell cycle process                                                                                           | 5,15           | <i>Anp32b, Ranbp1, Cdc2a, Ccnb1, Cdk2ap1, Cdt1, Erh, Gspt1,</i>                                                                                                                                                                             |

|                                                   |       |                                                         |
|---------------------------------------------------|-------|---------------------------------------------------------|
|                                                   |       | <i>Incenp, Mki67, Stmn1</i>                             |
| Ribonucleoprotein complex biogenesis and assembly | 5,88  | <i>Eif5a, Eif1, Itgb4bp, LSM2, Nhp211, Sfrs3</i>        |
| Cell cycle phase                                  | 5,36  | <i>Anp32b, Ccnb1, Cdc2a, Cdt1, Gspt1, Incenp, Mki67</i> |
| Regulation of centrosome cycle                    | 13,92 | <i>Ranbp1</i>                                           |
